# Supplementary material
Source: Springer Nature journal article supplement (https://www.springermedizin.de/resource/supplementary/12880_2014_227_MOESM6_ESM.pdf/9450280)

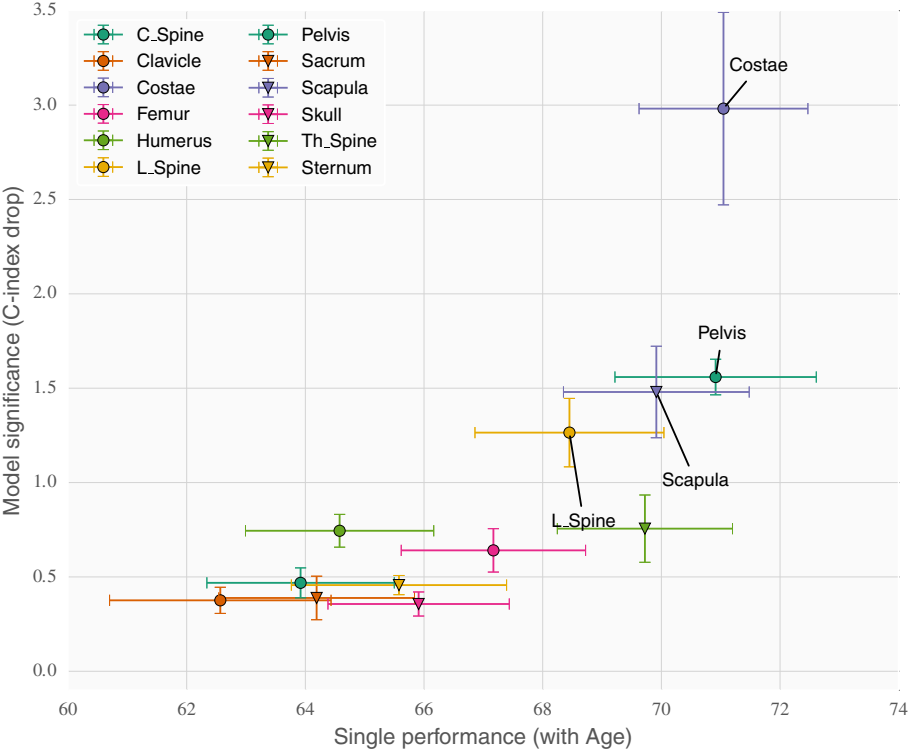

Supplement: MOESM6 [file 9450280]
